# Supplementary material for: Computational Screening of Plant-Derived Natural Products against SARS-CoV-2 Variants
Source: MDPI journal article supplement (doi:10.3390/futurepharmacol2040034), 2022-11-19

## Supplementary File

**SI 1.** Docking score plant-derived natural products against omicron (PDB ID: 7QO7)

| Sr. No. | Compounds                        | Docking score |
|---------|----------------------------------|---------------|
| 1       | Rutin                            | -10.224       |
| 2       | Hesperidin                       | -9.029        |
| 3       | Epicatechingallate               | -8.202        |
| 4       | Naringenin                       | -8.109        |
| 5       | Luteolin                         | -7.904        |
| 6       | Apigenin                         | -7.857        |
| 7       | Egcg                             | -7.7          |
| 8       | Diosmetin                        | -7.659        |
| 9       | Epicatechin                      | -7.596        |
| 10      | Daidzein                         | -7.431        |
| 11      | Resveratrol                      | -7.375        |
| 12      | Beta-glucan                      | -7.185        |
| 13      | Epigallocatechin                 | -6.999        |
| 14      | Naringin                         | -6.914        |
| 15      | Myricetin                        | -6.877        |
| 16      | Nigellimine-n-oxide              | -6.853        |
| 17      | Curcumin (enol)                  | -6.85         |
| 18      | Glucosamine                      | -6.819        |
| 19      | Hesperetin                       | -6.798        |
| 20      | Rosamarinic                      | -6.739        |
| 21      | Piperolein B                     | -6.692        |
| 22      | Thymoquinone                     | -6.588        |
| 23      | Taxifolin                        | -6.472        |
| 24      | Piperylin A                      | -6.395        |
| 25      | Isopelletierine                  | -6.395        |
| 26      | Oleocanthal                      | -6.394        |
| 27      | Fisetin                          | -6.376        |
| 28      | Piperol-B                        | -6.376        |
| 29      | Genistein                        | -6.303        |
| 30      | Carvacrol                        | -6.298        |
| 31      | Chrysin                          | -6.257        |
| 32      | Homoorientin                     | -6.24         |
| 33      | 5-hydroxy-7,8-dimethoxyflavanone | -6.239        |
| 34      | Withanolide A                    | -6.153        |
| 35      | Epigallocatechin                 | -6.15         |
| 36      | Tangeretin                       | -6.124        |
| 37      | Quercetin                        | -6.092        |
| 38      | Thymohydroquinone                | -6.075        |
| 39      | 5-hydroxy-7,8-dimethoxyflavone   | -6.051        |

|    |                                         |        |
|----|-----------------------------------------|--------|
| 40 | Nobiletin                               | -5.943 |
| 41 | Gallic acid                             | -5.928 |
| 42 | Cuminaldehyde                           | -5.905 |
| 43 | Nigellimine                             | -5.87  |
| 44 | Withanolide G                           | -5.817 |
| 45 | N-acetylcystein                         | -5.81  |
| 46 | Isopiperine                             | -5.806 |
| 47 | Cadinene                                | -5.806 |
| 48 | Elenolic acid                           | -5.768 |
| 49 | Cuminic acid                            | -5.758 |
| 50 | Kaempferol                              | -5.748 |
| 51 | 4-terpinol                              | -5.722 |
| 52 | Thymol                                  | -5.701 |
| 53 | A-muurolene                             | -5.693 |
| 54 | Carotol                                 | -5.668 |
| 55 | Anaferine                               | -5.666 |
| 56 | P-cymene                                | -5.649 |
| 57 | Piperol-A                               | -5.617 |
| 58 | Ferulic acid                            | -5.611 |
| 59 | Cabenene                                | -5.6   |
| 60 | Isochavicine                            | -5.584 |
| 61 | Carotol                                 | -5.576 |
| 62 | Myrcene                                 | -5.547 |
| 63 | 14-deoxy-11,12-didehydroandrographolide | -5.455 |
| 64 | Piperine                                | -5.378 |
| 65 | Sabinene                                | -5.357 |
| 66 | Andrograpanin                           | -5.341 |
| 67 | Cuscohygrine                            | -5.336 |
| 68 | Neoandrographolide                      | -5.308 |
| 69 | Nigellicine                             | -5.261 |
| 70 | Nigellidine                             | -5.256 |
| 71 | Limonene                                | -5.086 |
| 72 | 14-deoxy-14,15-didehydroandrographolide | -5.035 |
| 73 | Oleocanthol                             | -4.97  |
| 74 | Fenchone                                | -4.969 |
| 75 | Apigenin                                | -4.945 |
| 76 | Alliin                                  | -4.886 |
| 77 | Estragole                               | -4.789 |
| 78 | B-caryophyllene                         | -4.787 |
| 79 | Isoandrographolide                      | -4.757 |
| 80 | Galangin                                | -4.709 |
| 81 | Sulforaphane                            | -4.602 |
| 82 | Dithymoquinone                          | -4.533 |
| 83 | Andrographolide                         | -4.396 |

|     |                                         |        |
|-----|-----------------------------------------|--------|
| 84  | Withanolide D                           | -4.166 |
| 85  | Betapinene                              | -4.154 |
| 86  | Pipericine                              | -4.125 |
| 87  | Gingerol-6                              | -4.088 |
| 88  | Lipoic acid                             | -4.078 |
| 89  | Deguelin                                | -4.069 |
| 90  | 14-deoxyandrographolide                 | -3.989 |
| 91  | Kaempferol                              | -3.799 |
| 92  | 14-deoxy-14,15-didehydroandrographolide | -3.767 |
| 93  | Fisetin                                 | -3.761 |
| 94  | Gallic acid                             | -3.556 |
| 95  | Withanolide G                           | -3.533 |
| 96  | D-citronellol                           | -3.495 |
| 97  | Allicin                                 | -2.635 |
| 98  | Withaferin A                            | -2.114 |
| 99  | 14-deoxyandrographolide                 | -2.042 |
| 100 | Methyl-butyrates                        | -1.817 |

## SI 2. Docking score plant-derived natural products against delta (PDB ID: 7W92)

| Sr.No. | Compounds               | Docking score |
|--------|-------------------------|---------------|
| 1      | Rutin                   | -8.160        |
| 2      | EgCG                    | -7.993        |
| 3      | Hesperidin              | -7.873        |
| 4      | Epicatechin             | -7.736        |
| 5      | Naringin                | -7.528        |
| 6      | Epicatechingallate      | -7.454        |
| 7      | Epicatechin             | -7.348        |
| 8      | Homoorientin            | -7.249        |
| 9      | Naringenin              | -7.241        |
| 10     | Piperol-B               | -7.207        |
| 11     | Epigallocatechin        | -7.2          |
| 12     | EgCG                    | -6.901        |
| 13     | Beta-glucan             | -6.894        |
| 14     | Taxifolin               | -6.825        |
| 15     | Nigellimine-n-oxide     | -6.815        |
| 16     | Glucosamine             | -6.813        |
| 17     | Quercetin               | -6.795        |
| 18     | Piperol-A               | -6.791        |
| 19     | Anaferine               | -6.706        |
| 20     | Andrographolide         | -6.696        |
| 21     | 14-deoxyandrographolide | -6.685        |
| 22     | Apigenin                | -6.647        |
| 23     | Rosamarinic             | -6.629        |
| 24     | Hesperetin              | -6.611        |

|    |                                         |        |
|----|-----------------------------------------|--------|
| 25 | 14-deoxy-14,15-didehydroandrographolide | -6.561 |
| 26 | Myricetin                               | -6.521 |
| 27 | Piperylin A                             | -6.456 |
| 28 | Nigellidine                             | -6.377 |
| 29 | Chrysin                                 | -6.359 |
| 30 | Kaempferol                              | -6.273 |
| 31 | Neoandrographolide                      | -6.245 |
| 32 | Withanolide D                           | -6.242 |
| 33 | Galangin                                | -6.238 |
| 34 | Fisetin                                 | -6.232 |
| 35 | Withaferin A                            | -6.205 |
| 36 | Withanolide G                           | -6.159 |
| 37 | Withanolide A                           | -6.143 |
| 38 | Isochavicine                            | -6.119 |
| 39 | Thymohydroquinone                       | -6.083 |
| 40 | 14-deoxy-11,12-didehydroandrographolide | -6.054 |
| 41 | Isoandrographolide                      | -6.016 |
| 42 | Homoorientin                            | -6.012 |
| 43 | Carotol                                 | -5.947 |
| 44 | Piperolein B                            | -5.929 |
| 45 | Neoandrographolide                      | -5.912 |
| 46 | Daidzein                                | -5.905 |
| 47 | Genistein                               | -5.901 |
| 48 | Deguelin                                | -5.893 |
| 49 | Diosmetin                               | -5.867 |
| 50 | Andrograpanin                           | -5.854 |
| 51 | Nigellimine                             | -5.82  |
| 52 | Luteolin                                | -5.788 |
| 53 | Carvacrol                               | -5.774 |
| 54 | Isopelletierine                         | -5.772 |
| 55 | Cabenene                                | -5.732 |
| 56 | A-muurolene                             | -5.725 |
| 57 | Thymoquinone                            | -5.686 |
| 58 | Piperine                                | -5.684 |
| 59 | Piperanine                              | -5.684 |
| 60 | Withanone                               | -5.667 |
| 61 | Masilinic                               | -5.645 |
| 62 | Resveratrol                             | -5.582 |
| 63 | Cadinene                                | -5.555 |
| 64 | Cuscohygrine                            | -5.549 |
| 65 | Isopiperine                             | -5.51  |
| 66 | 5-hydroxy-7,8-dimethoxyflavanone        | -5.486 |
| 67 | Curcumin (enol)                         | -5.486 |
| 68 | Nobiletin                               | -5.447 |

|     |                                |        |
|-----|--------------------------------|--------|
| 69  | Ursolic acid                   | -5.436 |
| 70  | Oleocanthal                    | -5.428 |
| 71  | Thymol                         | -5.359 |
| 72  | Gallic acid                    | -5.245 |
| 73  | Dithymoquinone                 | -5.209 |
| 74  | B-caryophyllene                | -5.106 |
| 75  | Terinolene                     | -5.059 |
| 76  | 5-hydroxy-7,8-dimethoxyflavone | -4.996 |
| 77  | Nigellicine                    | -4.984 |
| 78  | Fenchone                       | -4.979 |
| 79  | Tangeretin                     | -4.95  |
| 80  | Cuminaldehyde                  | -4.943 |
| 81  | Myrcene                        | -4.886 |
| 82  | Oleonolic                      | -4.86  |
| 83  | P-cymene                       | -4.843 |
| 84  | Longifolene                    | -4.834 |
| 85  | 4-terpinol                     | -4.777 |
| 86  | Cuminic acid                   | -4.709 |
| 87  | Nigellimine                    | -4.575 |
| 88  | Sabinene                       | -4.528 |
| 89  | Taxifolin                      | -4.526 |
| 90  | Betapinene                     | -4.521 |
| 91  | Lipoic acid                    | -4.444 |
| 92  | Elenolic                       | -4.439 |
| 93  | Alliin                         | -4.429 |
| 94  | Dithymoquinone                 | -4.315 |
| 95  | T-anethole                     | -4.147 |
| 96  | Gingerol-6                     | -4.141 |
| 97  | Limonene                       | -4.069 |
| 98  | Sulforaphane                   | -4.068 |
| 99  | Estragole                      | -3.888 |
| 100 | Ferulic acid                   | -3.867 |

**SI 3.** Docking score plant-derived natural products against alpha (PDB ID: 8DLI)

| Sr.No | Compounds     | docking score |
|-------|---------------|---------------|
| 1     | Hesperidin    | -8.993        |
| 2     | Withanolide G | -8.766        |
| 3     | Rosamarinic   | -8.761        |
| 4     | Naringin      | -8.614        |
| 5     | Rutin         | -8.589        |
| 6     | Homoorientin  | -8.545        |
| 7     | Alliin        | -7.914        |
| 8     | Egcg          | -7.851        |
| 9     | Epicatechin   | -7.799        |

|    |                                         |        |
|----|-----------------------------------------|--------|
| 10 | Epigallocatechin                        | -7.765 |
| 11 | Epicatechingallate                      | -7.738 |
| 12 | Andrographolide                         | -7.702 |
| 13 | Anaferine                               | -7.509 |
| 14 | Withanolide D                           | -7.386 |
| 15 | Taxifolin                               | -7.258 |
| 16 | Nigellicine                             | -7.252 |
| 17 | 14-deoxy-14,15-didehydroandrographolide | -7.232 |
| 18 | Naringenin                              | -7.181 |
| 19 | Beta-glucan                             | -7.165 |
| 20 | Withanolide A                           | -7.161 |
| 21 | Glucosamine                             | -7.022 |
| 22 | Elenolic                                | -7.015 |
| 23 | Homovanillic                            | -6.984 |
| 24 | Gallic acid                             | -6.964 |
| 25 | Piperol-B                               | -6.955 |
| 26 | Myricetin                               | -6.916 |
| 27 | Withanolide G                           | -6.899 |
| 28 | Quercetin                               | -6.825 |
| 29 | Piperol-A                               | -6.772 |
| 30 | Fisetin                                 | -6.722 |
| 31 | Neoandrographolide                      | -6.683 |
| 32 | Withaferin A                            | -6.672 |
| 33 | Resveratrol                             | -6.524 |
| 34 | Isopelletierine                         | -6.49  |
| 35 | Daidzein                                | -6.471 |
| 36 | Hesperetin                              | -6.458 |
| 37 | Andrograpanin                           | -6.435 |
| 38 | Isopiperine                             | -6.424 |
| 39 | Andrographolide                         | -6.408 |
| 40 | Cuscohygrine                            | -6.399 |
| 41 | Galangin                                | -6.353 |
| 42 | Oleocanthol                             | -6.352 |
| 43 | Nigellidine                             | -6.319 |
| 44 | Kaempferol                              | -6.208 |
| 45 | Isoandrographolide                      | -6.199 |
| 46 | N-acetylcystein                         | -6.178 |
| 47 | Diosmetin                               | -6.173 |
| 48 | Genistein                               | -6.119 |
| 49 | Lipoic acid                             | -6.109 |
| 50 | Luteolin                                | -6.093 |
| 51 | Carotol                                 | -6.078 |
| 52 | Dithymoquinone                          | -6.065 |
| 53 | Apigenin                                | -6.043 |

|    |                                         |        |
|----|-----------------------------------------|--------|
| 54 | 5-hydroxy-7,8-dimethoxyflavone          | -5.99  |
| 55 | Andrograpanin                           | -5.971 |
| 56 | 14-deoxy-11,12-didehydroandrographolide | -5.97  |
| 57 | Isoandrographolide                      | -5.967 |
| 58 | 14-deoxyandrographolide                 | -5.939 |
| 59 | 5-hydroxy-7,8-dimethoxyflavanone        | -5.926 |
| 60 | N-acetylcystein                         | -5.919 |
| 61 | Ferulic acid                            | -5.866 |
| 62 | Nigellimine-n-oxide                     | -5.831 |
| 63 | Oleocanthol                             | -5.807 |
| 64 | Withanone                               | -5.782 |
| 65 | Piperine                                | -5.761 |
| 66 | Piperanine                              | -5.761 |
| 67 | Curcumin (enol)                         | -5.725 |
| 68 | Nobiletin                               | -5.669 |
| 69 | Isochavicine                            | -5.662 |
| 70 | Ursolic acid                            | -5.638 |
| 71 | 4-terpinol                              | -5.622 |
| 72 | Carvacrol                               | -5.455 |
| 73 | Chrysin                                 | -5.43  |
| 74 | Tangeretin                              | -5.423 |
| 75 | Cabenene                                | -5.414 |
| 76 | Piperylin A                             | -5.309 |
| 77 | Cadinene                                | -5.306 |
| 78 | Piperolein B                            | -5.243 |
| 79 | Cuminic acid                            | -5.23  |
| 80 | Nigellimine                             | -5.176 |
| 81 | A-muurolene                             | -5.167 |
| 82 | Fenchone                                | -5.163 |
| 83 | Longifolene                             | -5.112 |
| 84 | Cuminaldehyde                           | -5.081 |
| 85 | Cabenene                                | -5.05  |
| 86 | Dithymoquinone                          | -4.98  |
| 87 | T-anethole                              | -4.953 |
| 88 | B-caryophyllene                         | -4.768 |
| 89 | Thymol                                  | -4.761 |
| 90 | Terpinolene                             | -4.747 |
| 91 | Sabinene                                | -4.67  |
| 92 | Oleonolic                               | -4.547 |
| 93 | Sulforaphane                            | -4.183 |
| 94 | Myrcene                                 | -4.16  |
| 95 | Masilinic                               | -3.832 |
| 96 | Limonene                                | -3.679 |
| 97 | Allicin                                 | -3.394 |

|    |            |       |
|----|------------|-------|
| 98 | Gingerol-6 | -2.85 |
|----|------------|-------|

**SI 4.** Docking score plant-derived natural products against beta (PDB ID: 7LYQ)

| Sr. No. | Compounds                               | Docking score |
|---------|-----------------------------------------|---------------|
| 1.      | Egcg                                    | -8.369        |
| 2.      | Diosmetin                               | -8.2          |
| 3.      | Myricetin                               | -8.102        |
| 4.      | Homoorientin                            | -8.39         |
| 5.      | Naringin                                | -8.139        |
| 6.      | Rutin                                   | -8.095        |
| 7.      | Beta-glucan                             | -7.889        |
| 8.      | Hesperidin                              | -7.559        |
| 9.      | Epicatechingallate                      | -7.429        |
| 10.     | Taxifolin                               | -7.425        |
| 11.     | Apigenin                                | -7.393        |
| 12.     | Epicatechin                             | -7.367        |
| 13.     | Withanolide D                           | -7.273        |
| 14.     | Epigallocatechin                        | -7.272        |
| 15.     | Rosamarinic                             | -7.187        |
| 16.     | Kaempferol                              | -7.179        |
| 17.     | Fisetin                                 | -7.15         |
| 18.     | Neoandrographolide                      | -7.126        |
| 19.     | Withaferin A                            | -6.98         |
| 20.     | Luteolin                                | -6.92         |
| 21.     | Isoandrographolide                      | -6.906        |
| 22.     | Nigellidine                             | -6.866        |
| 23.     | Quercetin                               | -6.844        |
| 24.     | Gallic acid                             | -6.807        |
| 25.     | Glucosamine                             | -6.667        |
| 26.     | Withanolide G                           | -6.59         |
| 27.     | Thymohydroquinone                       | -6.564        |
| 28.     | Neoandrographolide                      | -6.548        |
| 29.     | Homovanillic                            | -6.421        |
| 30.     | Anaferine                               | -6.421        |
| 31.     | 14-deoxy-11,12-didehydroandrographolide | -6.394        |
| 32.     | Andrographolide                         | -6.376        |
| 33.     | Daidzein                                | -6.329        |
| 34.     | Dithymoquinone                          | -6.326        |
| 35.     | Genistein                               | -6.318        |
| 36.     | Deguelin                                | -6.313        |
| 37.     | Chrysin                                 | -6.302        |
| 38.     | Tangeretin                              | -6.283        |
| 39.     | Curcumin (enol)                         | -6.266        |
| 40.     | Piperol-B                               | -6.257        |



|     |                                         |        |
|-----|-----------------------------------------|--------|
| 41. | Naringenin                              | -6.243 |
| 42. | Piperol-A                               | -6.241 |
| 43. | Resveratrol                             | -6.18  |
| 44. | Galangin                                | -6.166 |
| 45. | 5-hydroxy-7,8-dimethoxyflavanone        | -6.153 |
| 46. | Isochavicine                            | -6.008 |
| 47. | A-muurolene                             | -5.992 |
| 48. | 14-deoxyandrographolide                 | -5.991 |
| 49. | Elenolic                                | -5.986 |
| 50. | Carvacrol                               | -5.934 |
| 51. | 14-deoxy-14,15-didehydroandrographolide | -5.925 |
| 52. | Nobiletin                               | -5.866 |
| 53. | Nigellicine                             | -5.855 |
| 54. | Anaferine                               | -5.84  |
| 55. | Andrograpanin                           | -5.763 |
| 56. | Withanolide A                           | -5.763 |
| 57. | Carotol                                 | -5.704 |
| 58. | Nigellimine-n-oxide                     | -5.69  |
| 59. | Withanolide G                           | -5.688 |
| 60. | 4-terpinol                              | -5.65  |
| 61. | Isopelletierine                         | -5.614 |
| 62. | Cabenene                                | -5.556 |
| 63. | Thymol                                  | -5.545 |
| 64. | Piperylin A                             | -5.545 |
| 65. | Cadinene                                | -5.4   |
| 66. | Fenchone                                | -5.354 |
| 67. | Ferulic acid                            | -5.327 |
| 68. | Isopiperine                             | -5.309 |
| 69. | Oleocanthol                             | -5.298 |
| 70. | Piperine                                | -5.273 |
| 71. | Piperanine                              | -5.273 |
| 72. | Cuminaldehyde                           | -5.254 |
| 73. | Longifolene                             | -5.25  |
| 74. | Thymoquinone                            | -5.18  |
| 75. | N-acetylcystein                         | -5.175 |
| 76. | Myrcene                                 | -5.106 |
| 77. | B-caryophyllene                         | -5.089 |
| 78. | Epigallocatechin                        | -5.046 |
| 79. | 4-terpinol                              | -5.04  |
| 80. | Nigellimine                             | -5.037 |
| 81. | Myrcene                                 | -5.029 |
| 82. | Cadinene                                | -5.028 |
| 83. | Cabenene                                | -4.981 |
| 84. | Piperolein B                            | -4.941 |

|      |                  |        |
|------|------------------|--------|
| 85.  | Lipoic acid      | -4.892 |
| 86.  | Terinolene       | -4.832 |
| 87.  | Sabinene         | -4.802 |
| 88.  | Cuminic acid     | -4.612 |
| 89.  | T-anethole       | -4.542 |
| 90.  | Withanolide D    | -4.54  |
| 91.  | Betapinene       | -4.504 |
| 92.  | Cuscohygrine     | -4.102 |
| 93.  | Estragole        | -4.088 |
| 94.  | Sulforaphane     | -3.934 |
| 95.  | Alliin           | -3.919 |
| 96.  | Hesperetin       | -3.623 |
| 97.  | Gingerol-6       | -3.395 |
| 98.  | D-citronellol    | -3.279 |
| 99.  | Methyl-butyrates | -1.972 |
| 100. | Oleonolic        | -1.904 |

**SI 5. Docking score plant-derived natural products against gamma (PDB ID: 7SBT)**

| Sr. No. | Compounds                               | Docking score |
|---------|-----------------------------------------|---------------|
| 1       | Rosmarinic                              | -9.235        |
| 2       | Epicatechin                             | -8.896        |
| 3       | Quercetin                               | -8.021        |
| 4       | Taxifolin                               | -7.948        |
| 5       | Kaempferol                              | -7.923        |
| 6       | Naringenin                              | -7.878        |
| 7       | Apigenin                                | -7.674        |
| 8       | Homoorientin                            | -7.663        |
| 9       | Fisetin                                 | -7.603        |
| 10      | Genistein                               | -7.537        |
| 11      | egcg                                    | -7.532        |
| 12      | Naringin                                | -7.354        |
| 13      | Resveratrol                             | -7.157        |
| 14      | 14-deoxy-14,15-didehydroandrographolide | -6.917        |
| 15      | Beta-glucan                             | -6.835        |
| 16      | Glucosamine                             | -6.827        |
| 17      | Piperol-A                               | -6.756        |
| 18      | Isoandrographolide                      | -6.676        |
| 19      | Epicatechingallate                      | -6.615        |
| 20      | Hesperetin                              | -6.589        |
| 21      | 4-terpinol                              | -6.487        |
| 22      | Daidzein                                | -6.469        |
| 23      | Chrysin                                 | -6.463        |
| 24      | Galangin                                | -6.446        |
| 25      | Diosmetin                               | -6.439        |

|    |                                         |        |
|----|-----------------------------------------|--------|
| 26 | Nigellicine                             | -6.431 |
| 27 | Carvacrol                               | -6.392 |
| 28 | Neoandrographolide                      | -6.387 |
| 29 | Nigellimine-n-oxide                     | -6.331 |
| 30 | Thymohydroquinone                       | -6.254 |
| 31 | Gallic acid                             | -6.239 |
| 32 | Elenolic                                | -6.224 |
| 33 | Carotol                                 | -6.214 |
| 34 | Andrographolide                         | -6.2   |
| 35 | Andrograpanin                           | -6.147 |
| 36 | Myricetin                               | -5.968 |
| 37 | 14-deoxy-11,12-didehydroandrographolide | -5.934 |
| 38 | Piperol-B                               | -5.921 |
| 39 | curcumin (enol)                         | -5.911 |
| 40 | Rutin                                   | -5.891 |
| 41 | Isochavicine                            | -5.89  |
| 42 | Thymol                                  | -5.888 |
| 43 | Cuminaldehyde                           | -5.877 |
| 44 | Epicatechingallate                      | -5.857 |
| 45 | Isopelletierine                         | -5.776 |
| 46 | Anaferine                               | -5.75  |
| 47 | 5-hydroxy-7,8-dimethoxyflavone          | -5.741 |
| 48 | A-murolene                              | -5.713 |
| 49 | Nigellimine                             | -5.683 |
| 50 | Cadinene                                | -5.67  |
| 51 | 5-hydroxy-7,8-dimethoxyflavanone        | -5.657 |
| 52 | Nigellidine                             | -5.64  |
| 53 | thymoquinone                            | -5.593 |
| 54 | P-cymene                                | -5.49  |
| 55 | Homovanillic                            | -5.409 |
| 56 | Fenchone                                | -5.363 |
| 57 | Cuscohygrine                            | -5.353 |
| 58 | Cabenene                                | -5.352 |
| 59 | Piperolein B                            | -5.342 |
| 60 | Piperine                                | -5.334 |
| 61 | Piperanine                              | -5.334 |
| 62 | Luteolin                                | -5.296 |
| 63 | 14-deoxyandrographolide                 | -5.262 |
| 64 | Cuminic acid                            | -5.229 |
| 65 | Isopiperine                             | -5.213 |
| 66 | deguelin                                | -5.226 |
| 67 | Ferulic acid                            | -5.153 |
| 68 | Oleocanthol                             | -5.148 |
| 69 | nobiletin                               | -5.022 |

|           |                  |        |
|-----------|------------------|--------|
| <b>70</b> | N-acetylcystein  | -4.967 |
| <b>71</b> | Apigenin         | -4.942 |
| <b>72</b> | Myrcene          | -4.915 |
| <b>73</b> | Piperylin A      | -4.904 |
| <b>74</b> | Dithymoquinone   | -4.862 |
| <b>75</b> | B-caryophyllene  | -4.856 |
| <b>76</b> | Longifolene      | -4.849 |
| <b>77</b> | Sabinene         | -4.841 |
| <b>78</b> | Kaempferol       | -4.798 |
| <b>79</b> | Alliin           | -4.705 |
| <b>80</b> | Naringenin       | -4.637 |
| <b>81</b> | Lipoic acid      | -4.457 |
| <b>82</b> | Tangeretin       | -4.456 |
| <b>83</b> | Withanolide G    | -4.443 |
| <b>84</b> | Limonene         | -4.442 |
| <b>85</b> | T-anethole       | -4.437 |
| <b>86</b> | deguelin         | -4.277 |
| <b>87</b> | Galangin         | -4.276 |
| <b>88</b> | Cabenene         | -4.275 |
| <b>89</b> | Sulforaphane     | -4.231 |
| <b>90</b> | Withanolide D    | -4.23  |
| <b>91</b> | Pipericine       | -4.227 |
| <b>92</b> | Betapinene       | -4.206 |
| <b>93</b> | Hesperidin       | -4.055 |
| <b>94</b> | Estragole        | -3.601 |
| <b>95</b> | D-citronellol    | -3.574 |
| <b>96</b> | Gingerol-6       | -3.43  |
| <b>97</b> | Withaferin A     | -3.205 |
| <b>98</b> | Allicin          | -2.937 |
| <b>99</b> | Methyl-butyrates | -1.924 |

**SI 6. The reactive sites of (A) Alpha, (B) Beta (C) Gamma (D) Delta (E) Omicron variants of SARS-CoV-2.**

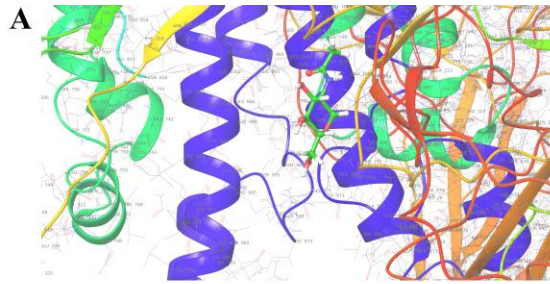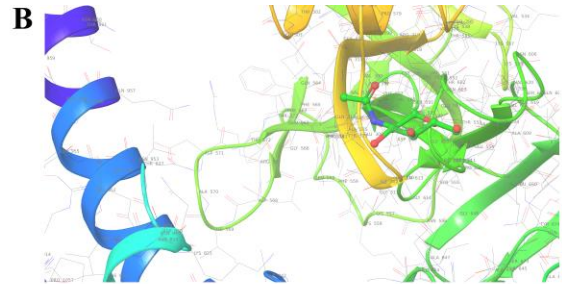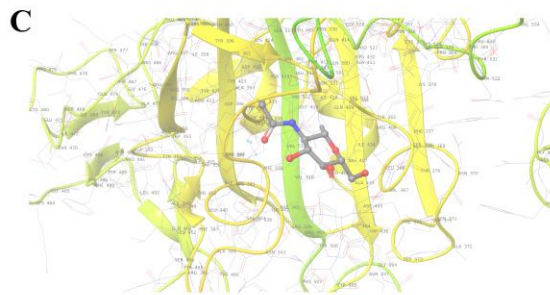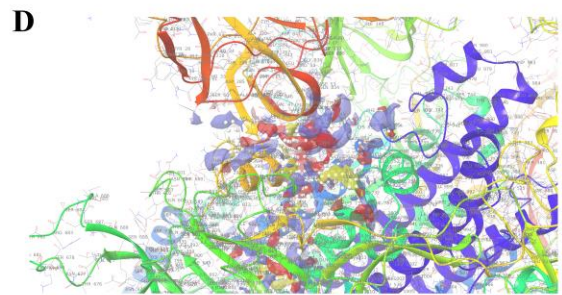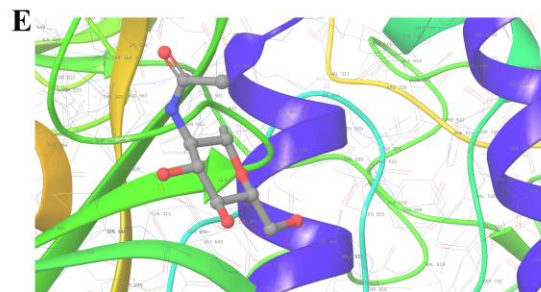

Supplement: s1 [file s1]
